# Supplementary material for: Vaccine Effects on Susceptibility and Symptomatology Can Change the Optimal Allocation of COVID-19 Vaccines: South Korea as an Example
Source: MDPI journal article supplement (doi:10.3390/jcm10132813), 2021-06-25
Supplement: s1 [file s1]

Table S1. Contact matrix.

| Age group | 0-9    | 10-19   | 20-29  | 30-39  | 40-49  | 50-59  | 60-69  | 70 over |
|-----------|--------|---------|--------|--------|--------|--------|--------|---------|
| 0-9       | 3.6291 | 0.8300  | 0.5731 | 1.4544 | 0.9502 | 0.4015 | 0.2046 | 0.0843  |
| 10-19     | 1.1550 | 13.2684 | 1.3583 | 1.3111 | 2.0143 | 0.7243 | 0.1575 | 0.0953  |
| 20-29     | 0.5287 | 1.7499  | 5.3694 | 2.6245 | 2.1260 | 1.4950 | 0.2523 | 0.0826  |
| 30-39     | 1.7398 | 1.3869  | 2.3147 | 5.0152 | 3.0261 | 1.5173 | 0.4803 | 0.1366  |
| 40-49     | 1.0527 | 2.4967  | 1.9639 | 3.0701 | 4.3102 | 1.7091 | 0.3557 | 0.1726  |
| 50-59     | 1.0196 | 2.2329  | 2.2747 | 2.4755 | 2.9717 | 3.0924 | 0.6089 | 0.2055  |
| 60-69     | 0.6344 | 0.6108  | 0.8605 | 1.5202 | 1.1932 | 1.1099 | 1.2349 | 0.2789  |
| 70 over   | 0.4525 | 0.7093  | 0.3451 | 0.7074 | 0.9602 | 0.7219 | 0.6165 | 0.7396  |

Each entry in the contact matrix ( $c_{ij}$ ) corresponds to the number of age- $j$  individuals contacted by an age- $i$  individual per day. We used country-specific total contact matrix of South Korea from [1]. Age bins in each case were originally provided in 5-year increments, so we collapsed these to ten-year bands using population-weighted sums [2,3].

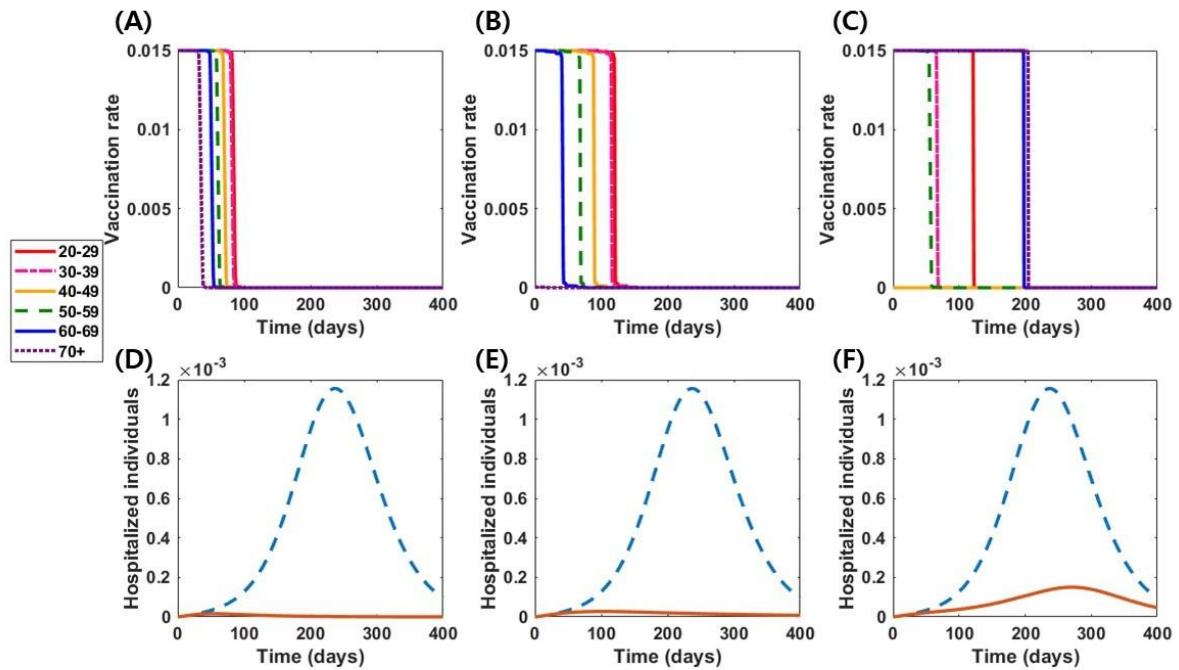

Figure S1. Optimal vaccination strategies in various vaccine scenarios. (A-C) Calculated optimal vaccination rates with vaccines 1 (A), 2 (B), and 3 (C). (D-F) Corresponding daily hospitalizations without immunization (dashed line) and with immunization (solid line) using vaccines 1 (D), 2 (E), and 3 (F).

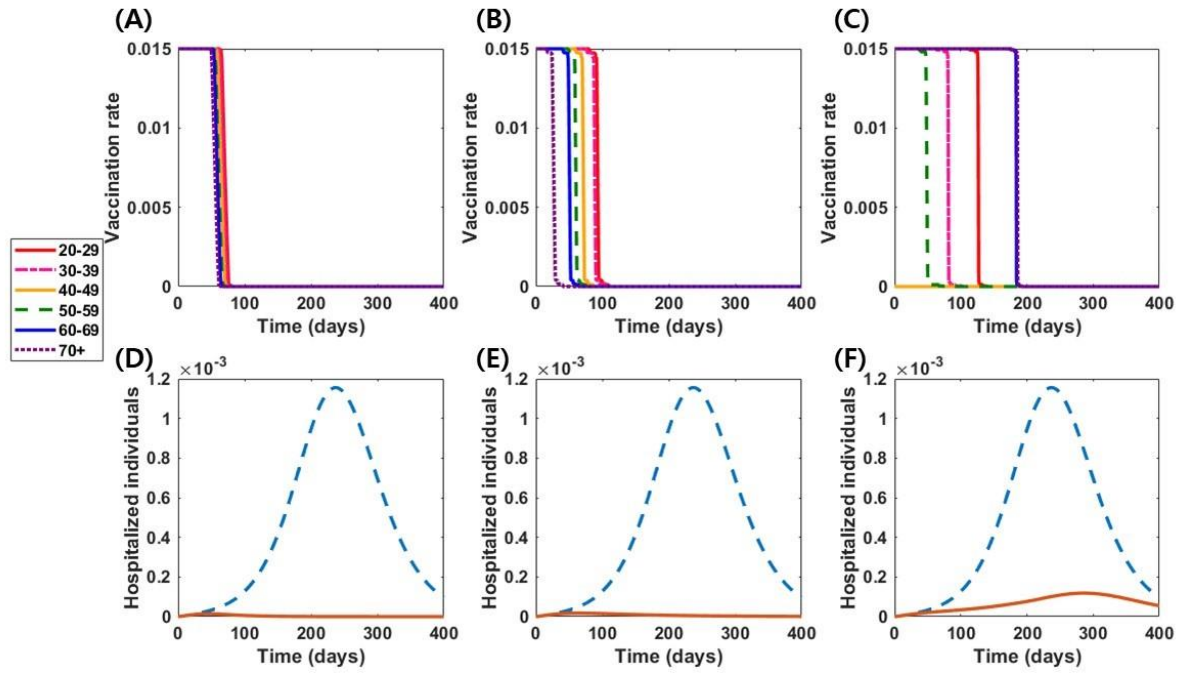

Figure S2. Optimal vaccination strategies in various vaccine scenarios. (A-C) Calculated optimal vaccination rates with vaccines 4 (A), 5 (B), and 6 (C). (D-F) Corresponding daily hospitalizations without immunization (dashed line) and with immunization (solid line) using vaccines 4 (D), 5 (E), and 6 (F).

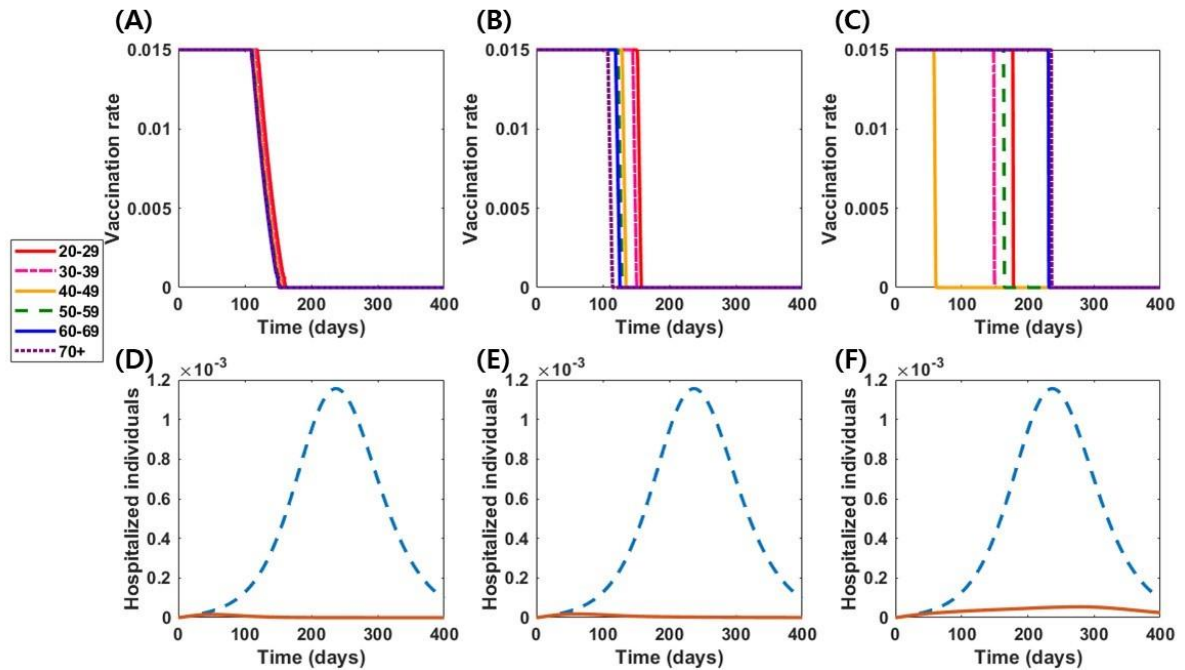

Figure S3. Optimal vaccination strategies in various vaccine scenarios with higher vaccine supply level (B=70%). (A-C) Calculated optimal vaccination rates with vaccines 1 (A), 2 (B), and 3 (C). (D-F) Corresponding daily hospitalizations without immunization (dashed line) and with immunization (solid line).

Corresponding daily hospitalizations without immunization (dashed line) and with immunization (solid line) using vaccines 1 (D), 2 (E), and 3 (F).

1. Prem, K.; Cook, A.R.; Jit, M. Projecting social contact matrices in 152 countries using contact surveys and demographic data. *PLoS Comput Biol* **2017**, *13*, e1005697, doi:10.1371/journal.pcbi.1005697.
2. Bubar, K.M.; Kissler, S.M.; Lipsitch, M.; Cobey, S.; Grad, Y.; Larremore, D.B. Model-informed COVID-19 vaccine prioritization strategies by age and serostatus. *medRxiv* **2020**.
3. Buckner, J.H.; Chowell, G.; Springborn, M.R. Dynamic Prioritization of COVID-19 Vaccines When Social Distancing is Limited for Essential Workers. *medRxiv* **2020**.
